# Supplementary material for: TiO2-Coated ZnO Nanowire Arrays: A Photocatalyst with Enhanced Chemical Corrosion Resistance
Source: MDPI journal article supplement (doi:10.3390/catal11111289), 2021-10-27
Supplement: s1 [file s1]

Archive with 1 entries (1 files):
- catalysts-1428067-supplementary.pdf
